# Supplementary material
Source: PubMed Central journal article supplement (PMC8288833)
Supplement: 10566_2021_9641_MOESM1_ESM.pdf [file 10566_2021_9641_MOESM1_ESM.pdf]

## Supplementary Material

### Questions about COVID-19 related impact on adolescents' daily functioning:

How has COVID-19 (Coronavirus) changed your day-to-day life?

|                            | Negative<br>Impact<br>(made it<br>worse) | No Impact<br>At All<br>(didn't<br>change it) | Positive<br>Impact<br>(made it<br>better) |
|----------------------------|------------------------------------------|----------------------------------------------|-------------------------------------------|
| Sleep                      | 1-----2-----3-----4-----5-----6-----7    |                                              |                                           |
| Diet                       | 1-----2-----3-----4-----5-----6-----7    |                                              |                                           |
| School                     | 1-----2-----3-----4-----5-----6-----7    |                                              |                                           |
| Relationships with family  | 1-----2-----3-----4-----5-----6-----7    |                                              |                                           |
| Relationships with friends | 1-----2-----3-----4-----5-----6-----7    |                                              |                                           |
| Extracurricular activities | 1-----2-----3-----4-----5-----6-----7    |                                              |                                           |
| Sports/exercise            | 1-----2-----3-----4-----5-----6-----7    |                                              |                                           |
| Job                        | 1-----2-----3-----4-----5-----6-----7    |                                              |                                           |
| Physical health            | 1-----2-----3-----4-----5-----6-----7    |                                              |                                           |
| Mental health              | 1-----2-----3-----4-----5-----6-----7    |                                              |                                           |
| Religion / spirituality    | 1-----2-----3-----4-----5-----6-----7    |                                              |                                           |
| Long-term goals            | 1-----2-----3-----4-----5-----6-----7    |                                              |                                           |
| Anything else?             | _____                                    |                                              |                                           |

**Questions about COVID-19 related stressors:**

To what degree did you experience any of the following stressors as a result of COVID-19 (Coronavirus)?

|                                                                      | Not at all | Slightly | Moderately | Very   | Extremely |
|----------------------------------------------------------------------|------------|----------|------------|--------|-----------|
| I didn't have access to basic needs (e.g., food, medication)         | 1-----     | 2-----   | 3-----     | 4----- | 5-----    |
| Money problems                                                       | 1-----     | 2-----   | 3-----     | 4----- | 5-----    |
| Fighting/arguing/conflict at home                                    | 1-----     | 2-----   | 3-----     | 4----- | 5-----    |
| Being cutoff from contact with needs (e.g., food, medication) others | 1-----     | 2-----   | 3-----     | 4----- | 5-----    |
| Not being able to go out or leave home when I want to                | 1-----     | 2-----   | 3-----     | 4----- | 5-----    |
| Not being able to attend special events (e.g., prom, graduation)     | 1-----     | 2-----   | 3-----     | 4----- | 5-----    |
| Having to change who I'm living with                                 | 1-----     | 2-----   | 3-----     | 4----- | 5-----    |
| Not being able to see people I care about in person                  | 1-----     | 2-----   | 3-----     | 4----- | 5-----    |
| Someone I care about getting sick                                    | 1-----     | 2-----   | 3-----     | 4----- | 5-----    |
| Worries about getting COVID-19 (coronavirus) yourself?               | 1-----     | 2-----   | 3-----     | 4----- | 5-----    |

**Questions about coping strategies:**

How much are you doing the following things to cope with COVID-19 (Coronavirus) and the changes and rules put in place as a result of the virus?

|                                                                 | Not at all | Rarely | Sometimes | Often  | Very Often |
|-----------------------------------------------------------------|------------|--------|-----------|--------|------------|
| Spending time with family in person                             | 1-----     | 2----- | 3-----    | 4----- | 5-----     |
| Spending time with family via technology (phone, social media)  | 1-----     | 2----- | 3-----    | 4----- | 5-----     |
| Spending time with friends in person                            | 1-----     | 2----- | 3-----    | 4----- | 5-----     |
| Spending time with friends via technology (phone, social media) | 1-----     | 2----- | 3-----    | 4----- | 5-----     |
| Browsing the internet/social media                              | 1-----     | 2----- | 3-----    | 4----- | 5-----     |
| Watching movies or shows                                        | 1-----     | 2----- | 3-----    | 4----- | 5-----     |
| Sleeping                                                        | 1-----     | 2----- | 3-----    | 4----- | 5-----     |
| Isolating/staying to myself                                     | 1-----     | 2----- | 3-----    | 4----- | 5-----     |
| Using mindfulness, meditation, or relaxation strategies         | 1-----     | 2----- | 3-----    | 4----- | 5-----     |
| Exercising                                                      | 1-----     | 2----- | 3-----    | 4----- | 5-----     |
| Yoga                                                            | 1-----     | 2----- | 3-----    | 4----- | 5-----     |
| Engaging in distracting activities                              | 1-----     | 2----- | 3-----    | 4----- | 5-----     |
| Watching the news                                               | 1-----     | 2----- | 3-----    | 4----- | 5-----     |
| Eating/cooking                                                  | 1-----     | 2----- | 3-----    | 4----- | 5-----     |
| Avoiding thinking about what is going on                        | 1-----     | 2----- | 3-----    | 4----- | 5-----     |
| Wishing things were different                                   | 1-----     | 2----- | 3-----    | 4----- | 5-----     |
| Anything else?                                                  | _____      |        |           |        |            |

**Question about perceived coping effectiveness:**

Not at all      Slightly      Moderately      Very      Extremely

How helpful have these coping strategies been to deal with the effects of COVID-19?

1-----2-----3-----4-----5
